# Supplementary material for: Roles of temperature, solvent, M/L ratios and anion in preparing complexes containing a Himta ligand
Source: Royal Society of Chemistry journal article supplement (doi:10.1039/c5ce02277k), 2016-01-01
Supplement: c5ce02277k1.pdf [file c5ce02277k1.pdf]

## Roles of Temperature, Solvent, M/L ratios and Anion in Preparing the Complexes Containing Himta Ligand

Tiantian Yu,<sup>a</sup> Shimin Wang,<sup>b</sup> Xuemin Li,<sup>a</sup> Xiaoli Gao,<sup>a</sup> Chunlin Zhou,<sup>a</sup> Jiajia Cheng, Baojun Li,<sup>a</sup> Jinpeng Li,<sup>\*a</sup> Junbiao Chang,<sup>a</sup> Hongwei Hou,<sup>a</sup> Zhongyi Liu<sup>\*a</sup>

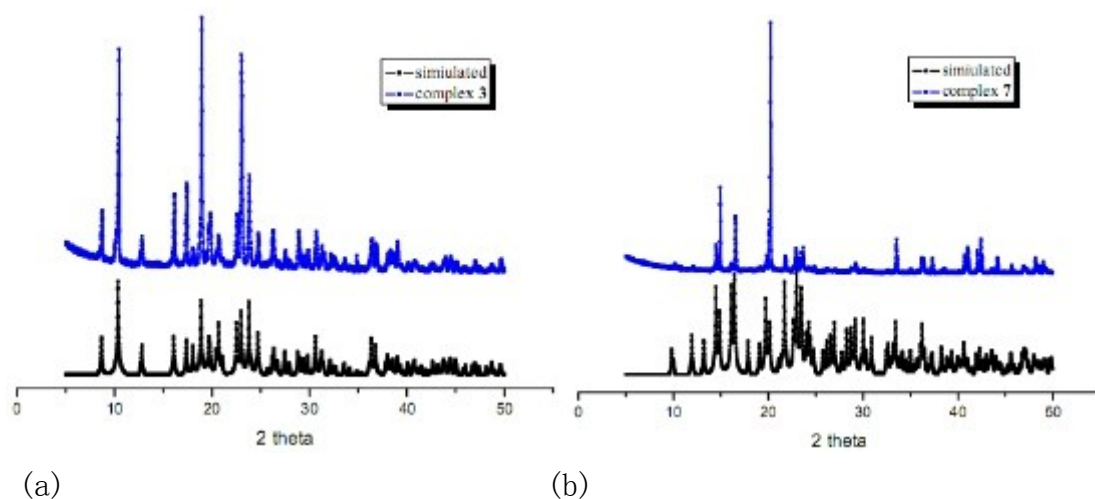

**Figure S1.** Powder X-ray diffraction (PXRD) patterns of **3** and **7**: (a) simulated PXRD pattern from the single crystal structure of **3** (black), observed PXRD pattern of **3** at room temperature (blue). (2) simulated PXRD pattern from the single crystal of **7** (black), observed PXRD pattern of **7** at room temperature (blue).

\* To whom correspondence should be addressed. E-mail: ljp-zd@163.com

<sup>a</sup>College of Chemistry and Molecular Engineering, Zhengzhou University, Zhengzhou 450001, Henan, P. R. China

<sup>b</sup>College of Material and Chemistry Engineering, Henan Institute of Engineering, Zhengzhou, 451191, P. R. China

Electronic supplementary information (ESI) available: The X-ray crystallographic files in CIF format. CCDC reference numbers 1437785-1437793 are for **1**~**9**, respectively.

**Table S1. Selected Bond Lengths (Å) and Angles (deg) for complexes 1~5**

| Complex 1           |            |                     |            |                     |            |
|---------------------|------------|---------------------|------------|---------------------|------------|
| Cu(1)-O(2)#1        | 1.957(3)   | O(2)#2-Cu(1)-N(1)#3 | 88.91(15)  | Cu(1)-N(1)#3        | 1.972(4)   |
| Cu(1)-O(2)#2        | 1.957(3)   | O(2)#1-Cu(1)-N(1)   | 88.91(15)  | Cu(1)-N(1)          | 1.972(4)   |
| O(2)#1-Cu(1)-O(2)#2 | 180        | O(2)#2-Cu(1)-N(1)   | 91.09(15)  | N(1)#3-Cu(1)-N(1)   | 180        |
| O(2)#1-Cu(1)-N(1)#3 | 91.09(15)  |                     |            |                     |            |
| Complex 2           |            |                     |            |                     |            |
| Co(1)-O(1)#3        | 2.080(3)   | Co(1)-O(1)#4        | 2.080(3)   | Co(1)-O(2)#5        | 2.131(3)   |
| Co(1)-O(2)          | 2.131(3)   | Co(1)-N(2)#6        | 2.173(3)   | Co(1)-N(2)#7        | 2.173(3)   |
| O(1)#3-Co(1)-O(1)#4 | 180        | O(1)#3-Co(1)-O(2)#5 | 90.62(12)  | O(1)#4-Co(1)-O(2)#5 | 89.38(1)   |
| N(2)#6-Co(1)-N(2)#7 | 180        | O(2)-Co(1)-N(2)#7   | 86.17(13)  | O(2)#5-Co(1)-N(2)#7 | 93.83(1)   |
| O(1)#4-Co(1)-N(2)#7 | 94.36(13)  | O(1)#3-Co(1)-N(2)#7 | 85.64(12)  | O(2)-Co(1)-N(2)#6   | 93.83(1)   |
| Co(1)-O(1)#3        | 2.080(3)   | Co(1)-O(1)#4        | 2.080(3)   | Co(1)-O(2)#5        | 2.131(3)   |
| Complex 3           |            |                     |            |                     |            |
| Mn(1)-N(5)#7        | 2.282(2)   | Mn(1)-O(2)#3        | 2.1753(19) | Mn(1)-O(2)#4        | 2.175(3)   |
| Mn(1)-O(1)#5        | 2.2062(19) | Mn(1)-O(1)          | 2.2062(19) | Mn(1)-N(5)#6        | 2.282(2)   |
| O(2)#3-Mn(1)-O(2)#4 | 180        | O(2)#3-Mn(1)-O(1)#5 | 89.49(7)   | O(2)#4-Mn(1)-O(1)#5 | 90.51(7)   |
| N(5)#6-Mn(1)-N(5)#7 | 180        | O(1)-Mn(1)-N(5)#7   | 94.56(8)   | O(1)#5-Mn(1)-N(5)#7 | 85.44(8)   |
| O(2)#4-Mn(1)-N(5)#7 | 85.76(8)   | O(2)#3-Mn(1)-N(5)#7 | 94.24(8)   | O(1)-Mn(1)-N(5)#6   | 85.44(8)   |
| Complex 4           |            |                     |            |                     |            |
| Cd(1)-N(2)#7        | 2.325(3)   | Cd(1)-O(2)#3        | 2.307(3)   | Cd(1)-O(2)#4        | 2.307(3)   |
| Cd(1)-O(1)#5        | 2.325(3)   | Cd(1)-O(1)#6        | 2.325(3)   | Cd(1)-N(2)          | 2.325(3)   |
| O(1)#5-Cd(1)-N(2)   | 95.62(11)  | O(2)#3-Cd(1)-O(2)#4 | 180        | O(2)#3-Cd(1)-O(1)#5 | 88.37(1)   |
| O(2)#4-Cd(1)-O(1)#5 | 91.63(10)  | O(2)#3-Cd(1)-O(1)#6 | 91.63(10)  | O(2)#4-Cd(1)-O(1)#6 | 88.37(1)   |
| O(1)#5-Cd(1)-O(1)#6 | 180        | N(2)-Cd(1)-N(2)#7   | 180        | O(1)#6-Cd(1)-N(2)#7 | 95.62(1)   |
| Complex 5           |            |                     |            |                     |            |
| Pb(1)-O(1)#1        | 2.441(5)   | O(1)#1-Pb(1)-O(1)   | 78.2(2)    | O(1)#4-Pb(1)-O(2)#1 | 112.76(16) |
| Pb(1)-O(1)          | 2.441(5)   | O(1)#1-Pb(1)-N(1)#2 | 79.2(2)    | O(1)#5-Pb(1)-O(2)#1 | 72.60(16)  |
| Pb(1)-N(1)#2        | 2.656(7)   | O(1)-Pb(1)-N(1)#2   | 79.4(2)    | O(1)#1-Pb(1)-O(2)   | 126.02(16) |
| Pb(1)-N(1)#3        | 2.656(7)   | O(1)#1-Pb(1)-N(1)#3 | 79.4(2)    | N(1)#2-Pb(1)-O(2)   | 87.4(2)    |

|                     |           |                     |            |                     |            |
|---------------------|-----------|---------------------|------------|---------------------|------------|
| Pb(1)-O(1)#4        | 2.762(5)  | N(1)#3-Pb(1)-O(2)   | 91.2(2)    | O(1)#4-Pb(1)-O(2)   | 72.60(17)  |
| Pb(1)-O(1)#5        | 2.762(5)  | O(1)#5-Pb(1)-O(2)   | 112.76(16) | O(3)#1-Pb(1)-O(2)   | 173.9(2)   |
| Pb(1)-O(2)#1        | 2.861(6)  | N(1)#3-Pb(1)-O(1)#5 | 127.8(2)   | N(1)#2-Pb(1)-O(1)#5 | 77.54(18)  |
| Pb(1)-O(2)          | 2.861(6)  | O(1)#4-Pb(1)-O(1)#5 | 67.7(2)    | O(1)-Pb(1)-O(1)#5   | 150.6(3)   |
| O(1)-Pb(1)-N(1)#3   | 79.2(2)   | O(1)#1-Pb(1)-O(2)#1 | 47.91(15)  | O(1)#1-Pb(1)-O(1)#5 | 114.73(19) |
| N(1)#2-Pb(1)-N(1)#3 | 152.3(3)  | O(1)-Pb(1)-O(2)#1   | 126.02(16) | N(1)#3-Pb(1)-O(1)#4 | 77.54(18)  |
| O(1)#1-Pb(1)-O(1)#4 | 150.6(3)  | N(1)#2-Pb(1)-O(2)#1 | 91.2(2)    | N(1)#2-Pb(1)-O(1)#4 | 127.8(2)   |
| O(1)-Pb(1)-O(2)     | 47.91(15) | N(1)#3-Pb(1)-O(2)#1 | 87.4(2)    | O(1)-Pb(1)-O(1)#4   | 114.73(19) |

**Symmetry transformations used to generate equivalent atoms:**

For 1: #1  $-x+1, y+1/2, -z+1/2$ ; #2  $x, -y+1/2, z+1/2$ ; #3  $-x+1, -y+1, -z+1$ ; #4  $-x+1, y-1/2, -z+1/2$

For 2: #1,  $x+1, y, z$ ; #2,  $-x+1, y+1/2, -z+1/2$ ; #3,  $-x+2, -y, -z+1$ ; #4,  $x-1, y, z$ ; #5,  $-x+1, -y, -z+1$ ; #6,  $x, -y+1/2, z+1/2$ ; #7,  $-x+1, y-1/2, -z+1/2$ .

For 3: #1,  $-x+2, y+1/2, -z+1/2$ ; #2,  $x-1, y, z$ ; #3,  $-x+1, -y, -z$ ; #4,  $x+1, y, z$ ; #5,  $-x+2, -y, -z$ ; #6,  $-x+2, y-1/2, -z+1/2$ ; #7,  $x, -y+1/2, z-1/2$ .

For 4: #1,  $-x+1, y+1/2, -z+1/2$ ; #2,  $-x, y+1/2, -z+1/2$ ; #3,  $-x+1, y-1/2, -z+1/2$ ; #4,  $x, -y+1/2, z+1/2$ ; #5,  $-x, y-1/2, -z+1/2$ ; #6,  $x+1, -y+1/2, z+1/2$ ; #7,  $-x+1, -y, -z+1$ .

For 5: #1,  $-x+3/2, -y+3/2, z$ ; #2,  $-x+1, y-1/2, -z+3/2$ ; #3,  $x+1/2, -y+2, -z+3/2$ ; #4,  $-x+3/2, y, z+1/2$ ; #5,  $x, -y+3/2, z+1/2$ ; #6,  $-x+3/2, y, z-1/2$ ; #7,  $x-1/2, -y+2, -z+3/2$ .

**Table S2. Selected Bond Lengths (Å) and Angles (deg) for complexes 6~9**

| Complex 6         |          |                     |           |                     |           |
|-------------------|----------|---------------------|-----------|---------------------|-----------|
| Co(1)-O(3)        | 2.097(2) | O(4)#1-Co(1)-O(4)   | 180       | N(2)-Co(1)-N(2)#1   | 180       |
| Co(1)-O(3)#1      | 2.097(2) | O(3)-Co(1)-N(2)     | 90.29(9)  | O(4)-Co(1)-N(2)#1   | 88.58(9)  |
| Co(1)-O(4)#1      | 2.119(2) | O(3)#1-Co(1)-N(2)   | 89.71(9)  | O(4)#1-Co(1)-N(2)#1 | 91.42(9)  |
| Co(1)-O(4)        | 2.119(2) | O(4)#1-Co(1)-N(2)   | 88.58(9)  | O(3)#1-Co(1)-N(2)#1 | 90.29(9)  |
| Co(1)-N(2)        | 2.148(2) | O(4)-Co(1)-N(2)     | 91.42(9)  | O(3)-Co(1)-N(2)#1   | 89.71(9)  |
| Co(1)-N(2)#1      | 2.148(2) | O(3)#1-Co(1)-O(4)#1 | 92.41(9)  | O(3)-Co(1)-O(4)     | 92.41(9)  |
| Complex 7         |          |                     |           |                     |           |
| Mn(1)-O(7)        | 2.169(2) | O(5)#1-Mn(1)-O(5)   | 180       | O(7)#1-Mn(1)-O(5)   | 86.70(9)  |
| Mn(1)-O(7)#1      | 2.169(2) | O(7)-Mn(1)-N(1)     | 90.28(9)  | O(7)-Mn(1)-O(5)     | 93.30(9)  |
| Mn(1)-O(5)#1      | 2.194(2) | O(7)#1-Mn(1)-N(1)   | 89.72(9)  | N(1)-Mn(1)-N(1)#1   | 180       |
| Mn(1)-O(5)        | 2.194(2) | O(5)#1-Mn(1)-N(1)   | 88.89(8)  | O(7)#1-Mn(1)-O(5)#1 | 93.30(9)  |
| Mn(1)-N(1)        | 2.258(2) | O(5)-Mn(1)-N(1)     | 91.11(8)  | O(5)-Mn(1)-N(1)#1   | 88.89(8)  |
| Mn(1)-N(1)#1      | 2.258(2) | O(7)-Mn(1)-N(1)#1   | 89.72(9)  | O(7)-Mn(1)-O(5)#1   | 86.70(9)  |
| O(7)-Mn(1)-O(7)#1 | 180      | O(7)#1-Mn(1)-N(1)#1 | 90.28(9)  | O(5)#1-Mn(1)-N(1)#1 | 91.11(8)  |
| Complex 8         |          |                     |           |                     |           |
| Ni(1)-O(2)#1      | 2.070(2) | O(2)-Ni(1)-O(1)     | 92.01(10) | O(1)-Ni(1)-N(2)     | 91.10(10) |
| Ni(1)-O(2)        | 2.070(2) | O(1)#1-Ni(1)-O(1)   | 180       | O(2)#1-Ni(1)-O(1)   | 87.99(10) |
| Ni(1)-O(1)#1      | 2.088(2) | O(2)#1-Ni(1)-N(2)#1 | 90.82(10) | O(2)-Ni(1)-O(1)#1   | 87.99(10) |
| Ni(1)-O(1)        | 2.088(2) | O(2)-Ni(1)-N(2)#1   | 89.18(10) | O(1)#1-Ni(1)-N(2)   | 88.90(10) |
| Ni(1)-N(2)#1      | 2.094(2) | O(1)#1-Ni(1)-N(2)#1 | 91.10(10) | O(2)#1-Ni(1)-O(1)#1 | 92.01(10) |
| Ni(1)-N(2)        | 2.094(2) | O(1)-Ni(1)-N(2)#1   | 88.90(10) | O(2)-Ni(1)-N(2)     | 90.82(10) |
| O(2)#1-Ni(1)-O(2) | 180      | O(2)#1-Ni(1)-N(2)   | 89.18(10) |                     |           |
| Complex 9         |          |                     |           |                     |           |
| Zn(1)-O(4)        | 2.114(2) | O(4)-Zn(1)-O(3)#1   | 92.58(9)  | O(4)-Zn(1)-N(1)     | 90.49(10) |
| Zn(1)-O(4)#1      | 2.114(2) | O(4)#1-Zn(1)-O(3)#1 | 87.42(9)  | O(3)#1-Zn(1)-O(3)   | 180       |
| Zn(1)-N(1)#1      | 2.123(2) | N(1)#1-Zn(1)-O(3)#1 | 89.03(9)  | O(4)#1-Zn(1)-N(1)   | 89.51(10) |

|                   |          |                   |          |                   |           |
|-------------------|----------|-------------------|----------|-------------------|-----------|
| Zn(1)-N(1)        | 2.123(2) | N(1)-Zn(1)-O(3)#1 | 90.97(9) | N(1)#1-Zn(1)-N(1) | 180       |
| Zn(1)-O(3)#1      | 2.150(2) | O(4)-Zn(1)-O(3)   | 87.42(9) | O(4)-Zn(1)-N(1)#1 | 89.51(10) |
| Zn(1)-O(3)        | 2.150(2) | O(4)#1-Zn(1)-O(3) | 92.58(9) | N(1)-Zn(1)-O(3)   | 89.03(9)  |
| O(4)-Zn(1)-O(4)#1 | 180      | N(1)#1-Zn(1)-O(3) | 90.97(9) |                   |           |

---

Symmetry transformations used to generate equivalent atoms:

For **6**: #1, -x+1,-y,-z+2. For **7**: #1, -x+1,-y+1,-z-1. For **8**: #1 -x,-y+1,-z+1. For **9**: #1, -x+1,-y,-z+2.

**Table S3. Hydrogen bond geometries in the crystal structures of complex 1, 6~9.**

| D-H...A                        | D-H     | d(H...A) | d(D...A)  | ∠(DHA)  |
|--------------------------------|---------|----------|-----------|---------|
| <b>1</b>                       |         |          |           |         |
| O(4)-H(4A)...O(3) <sup>c</sup> | 0.89    | 2.23     | 2.747(19) | 116.7   |
| O(4)-H(4B)...N(5) <sup>b</sup> | 0.87    | 2.12     | 2.907(8)  | 149.7   |
| O(5)-H(5C)...O(5) <sup>d</sup> | 0.85    | 2.55     | 3.136(16) | 127.4   |
| O(5)-H(5D)...N(4) <sup>a</sup> | 0.85    | 2.62     | 3.039(9)  | 111.3   |
| <b>6</b>                       |         |          |           |         |
| O3-H3W...O9 <sup>b</sup>       | 1.07(3) | 1.60(3)  | 2.651(3)  | 169(2)  |
| O3-H3WA...O2 <sup>c</sup>      | 0.79(3) | 1.95(3)  | 2.740(3)  | 176(3)  |
| O4-H4W...O1 <sup>d</sup>       | 0.84(4) | 1.94(4)  | 2.764(3)  | 171(3)  |
| O4-H4WA...O1 <sup>a</sup>      | 0.82(4) | 1.93(4)  | 2.728(3)  | 162(4)  |
| O9-H9W...O2                    | 0.89(4) | 1.98(4)  | 2.847(3)  | 164(4)  |
| O9-H9WA...N5 <sup>c</sup>      | 1.02(5) | 1.82(5)  | 2.838(3)  | 176(4)  |
| O9-H9WA...N4 <sup>c</sup>      | 1.02(5) | 2.59(5)  | 3.507(4)  | 149(4)  |
| <b>7</b>                       |         |          |           |         |
| O5-H5W...O1 <sup>a</sup>       | 0.81(4) | 2.03(4)  | 2.859(3)  | 164(4)  |
| O7-H7W...O2 <sup>b</sup>       | 0.89(4) | 1.84(4)  | 2.737(3)  | 178(3)  |
| O5-H5WA...O1 <sup>c</sup>      | 0.79(3) | 1.97(4)  | 2.754(3)  | 171(3)  |
| O7-H7WA...O9 <sup>d</sup>      | 0.79(3) | 1.88(3)  | 2.662(3)  | 170(3)  |
| O9-H9W...N5 <sup>b</sup>       | 0.82(4) | 2.03(4)  | 2.843(3)  | 172(4)  |
| O9-H9WA...O2                   | 0.85(4) | 2.03(4)  | 2.859(3)  | 164(4)  |
| <b>8</b>                       |         |          |           |         |
| O1-H1...O6 <sup>a</sup>        | 0.81    | 2.00     | 2.730(3)  | 150.7   |
| O1-H1W...O6 <sup>b</sup>       | 1.06    | 1.70     | 2.758(3)  | 176.8   |
| O2-H2...O5 <sup>c</sup>        | 0.80    | 2.08     | 2.718(3)  | 136.6   |
| O2-H2W...O3                    | 0.86(1) | 1.85(1)  | 2.649(4)  | 154(3)  |
| O3-H3...N5 <sup>d</sup>        | 0.85(1) | 1.99(3)  | 2.832(4)  | 170(18) |
| O3-H3W...O5 <sup>e</sup>       | 0.85(1) | 2.03(6)  | 2.834(4)  | 157(15) |

|                           |         |         |          |        |
|---------------------------|---------|---------|----------|--------|
| O5-H5W...O2 <sup>a</sup>  | 0.99(5) | 1.89(5) | 2.846(3) | 161(4) |
| O5-H5WA...N7 <sup>b</sup> | 1.07(7) | 1.76(7) | 2.824(3) | 174(5) |
| O5-H5WA...N6 <sup>b</sup> | 1.07(7) | 2.54(7) | 3.499(3) | 149(5) |
| O3-H3W...O1 <sup>c</sup>  | 0.86(4) | 1.91(4) | 2.763(3) | 170(3) |
| O4-H4WA...O2 <sup>c</sup> | 0.85(1) | 1.88(1) | 2.730(2) | 177(3) |
| O3-H3WA...O1 <sup>d</sup> | 0.79(3) | 1.96(3) | 2.729(3) | 161(3) |
| O4-H4W...O5               | 0.87(1) | 1.80(1) | 2.651(3) | 167(3) |

Symmetry codes:

For **1**: a  $-x+1, y+1/2, -z+1/2$ ; b  $-x+1, -y+1, -z+1$ ; c  $-x+1/2, y, -z+1$ ; d  $-x+3/2, y, -z+1$ .

For **6**: a  $-x, -y+1, -z+1$ ; b  $x, y, z+1$ ; c  $-x+1, -y+1, -z+1$ ; d  $x, y-1, z+1$ .

For **7**: a  $-x+2, -y, -z$ ; b  $-x+1, -y, -z$ ; c  $x, y+1, z-1$ ; d  $x, y, z-1$ .

For **8**: a  $-x, -y+1, -z+1$ ; b  $x, y+1, z-1$ ; c  $-x, -y, -z+2$ ; d  $-x, -y, -z+1$ ; e  $x, y, z-1$ .

For **9**: a  $x, y, z+1$ ; b  $-x+1, -y+1, -z+2$ ; c  $-x+1, -y+1, -z+1$ ; d  $x+1, y-1, z+1$ .
